# Supplementary material
Source: Springer Nature journal article supplement (https://www.springermedizin.de/resource/supplementary/12984_2011_352_MOESM1_ESM.pdf/9605824)
Supplement: MOESM1 [file 9605824]

# WHICH KINDS OF ROBOTS TO USE?

rehabilitation  
objects

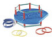

<100€

passive devices  
with sensors

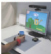

<1000€

simple robotic devices  
for decentralized use

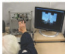

<10'000€

complex robotic  
systems

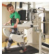

>100'000€

cost, complexity, need for assistance

safety, number of potential users
